# Supplementary material for: Human gain-of-function variants in HNF1A confer protection from diabetes but independently increase hepatic secretion of atherogenic lipoproteins
Source: PubMed Central journal article supplement — Cell Genom. 2023 May 30;3(7):100339. doi: 10.1016/j.xgen.2023.100339 (PMC10363808; doi:10.1016/j.xgen.2023.100339), 2023-05-30
Supplement: mmc1.pdf [file mmc1.pdf]

**Supplemental information**

**Human gain-of-function variants in HNF1A confer protection from diabetes but independently increase hepatic secretion of atherogenic lipoproteins**

**Natalie DeForest, Babu Kavitha, Siqi Hu, Roi Isaac, Lynne Krohn, Minxian Wang, Xiaomi Du, Camila De Arruda Saldanha, Jenny Gylys, Edoardo Merli, Ruben Abagyan, Laeya Najmi, Viswanathan Mohan, Alynlam Human Genetics, AMP-T2D Consortium, Jason Flannick, Gina M. Peloso, Philip L.S.M. Gordts, Sven Heinz, Aimee M. Deaton, Amit V. Khera, Jerrold Olefsky, Venkatesan Radha, and Amit R. Majithia**

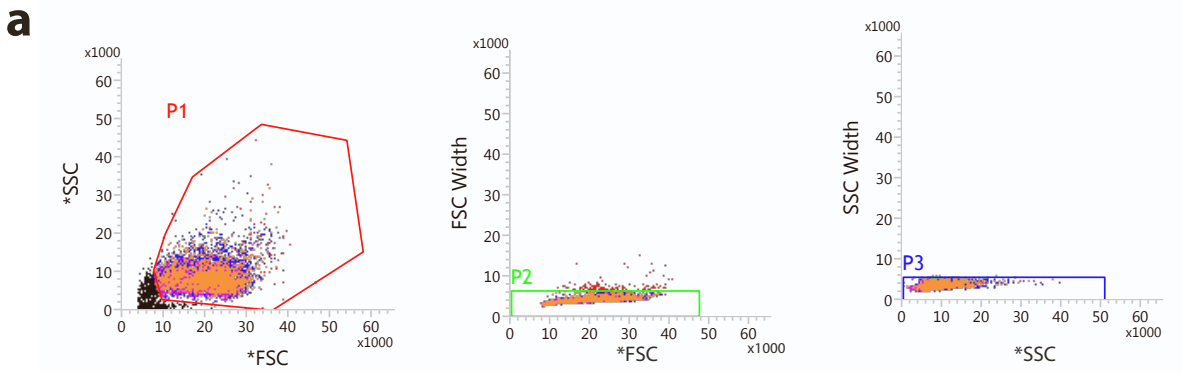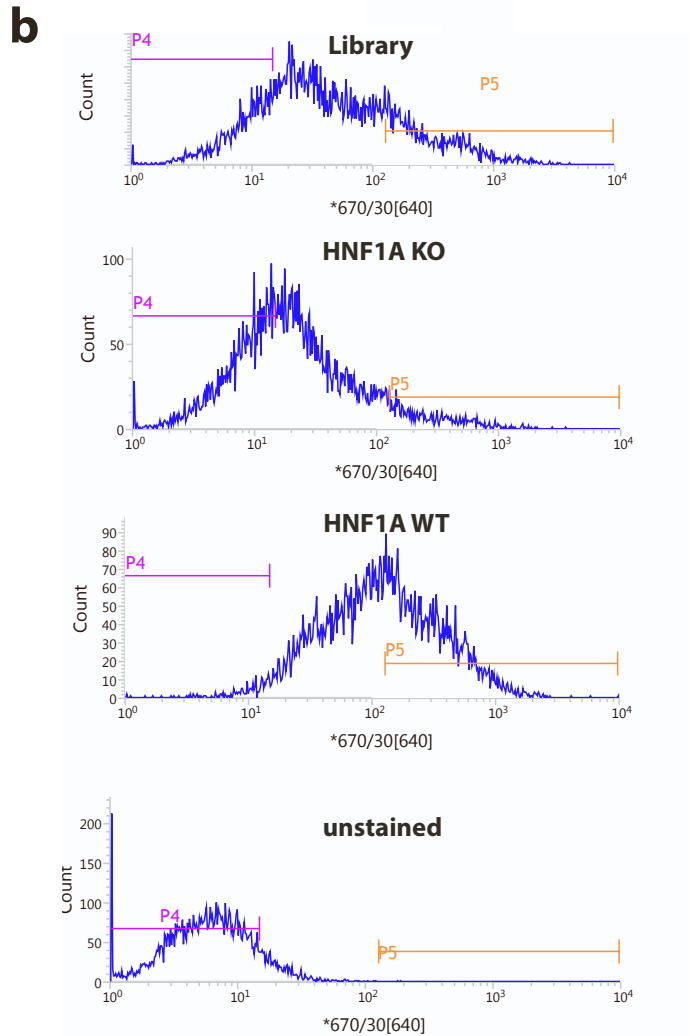

**c**

| Populations: Library |         |         |          |
|----------------------|---------|---------|----------|
| Populations          | Even... | % Total | % Parent |
| All Events           | 10,000  | 100.00% | ####     |
| P1                   | 9,276   | 92.76%  | 92.76%   |
| P2                   | 9,122   | 91.22%  | 98.34%   |
| P3                   | 9,097   | 90.97%  | 99.73%   |
| P4                   | 1,970   | 19.70%  | 21.66%   |
| P5                   | 2,083   | 20.83%  | 22.90%   |

**Supplementary Figure 1. FACS sorting data for comprehensive functional testing of 11,970 HNF1A variants, Related to Figure 1**

**a)** Forward scatter versus side scatter (FSC vs SSC) density plots describing cellular gating: the P1 gate eliminated cellular fragments and debris; the P2 and P3 gates eliminated cell doublets. **b)** Histograms of fluorescence intensity at 670 nm for HUH7 cell populations stained with APC-conjugated TM4SF4 antibody and unstained cells. 'Library' refers to HNF1A KO cells infected with the lentiviral plasmid library of 11,970 HNF1A variants. P4 and P5 show the gates for the TM4SF4 'low' and 'high' populations respectively **c)** Table showing the percentage of cells passing through gates shown in **a)** and **b)**.

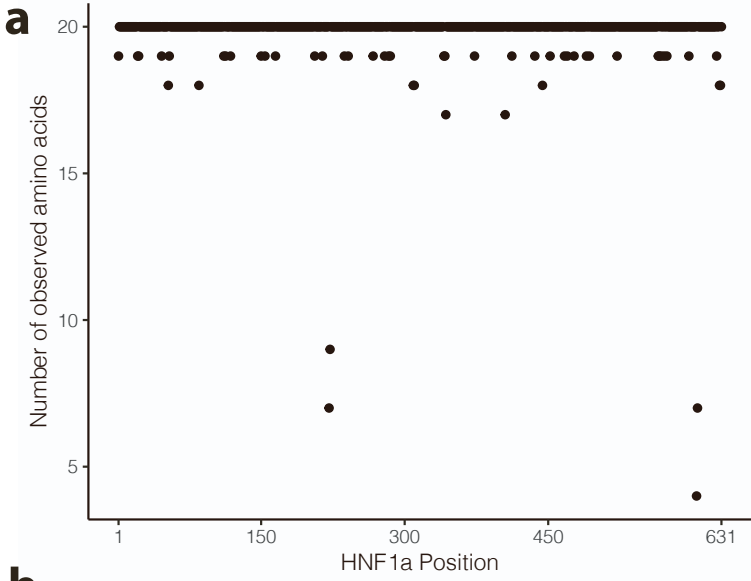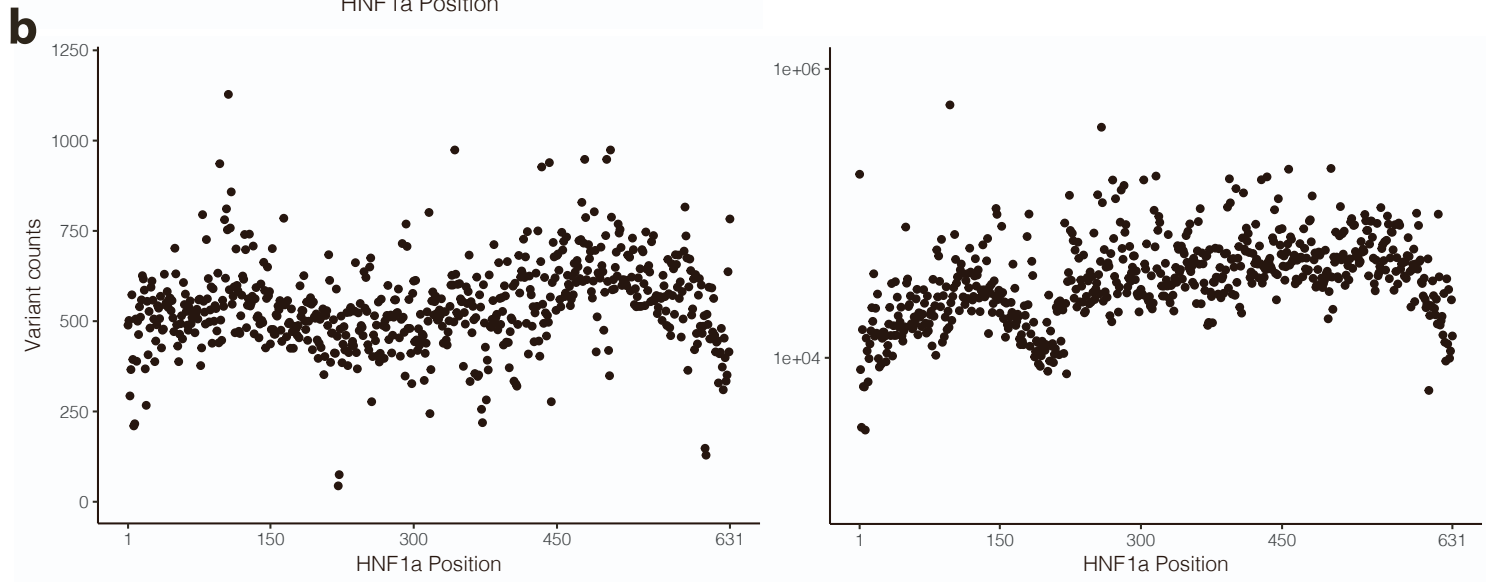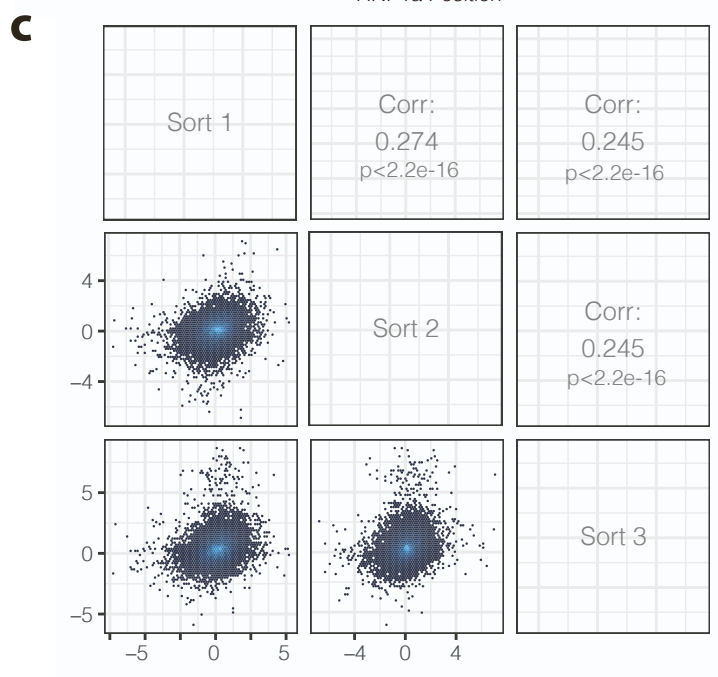

**Supplementary Figure 2. HNF1A variant library completeness and balance, Related to Figure 1**

**a)** Sequencing of the synthesized HNF1A mutagenesis library. At each position along the HNF1A primary amino acid sequence the number of observed amino acids (out of 20 possible) is shown. Amino acid positions 221, 222, 605, and 606 had low diversity. Overall the library was 99.1% percent complete, containing 11,858 of 11,970 possible variants.

**b)** Observed counts of HNF1A protein-coding variants per amino acid position in the (left panel) original synthesized library and (right panel) counts recovered following introduction into hepatocytes following FACS sorting.

**c)** Raw log two fold changes of HNF1A variants from TM4SF4<sup>high</sup> and TM4SF4<sup>low</sup> sorting bins across three independent sorting experiments.

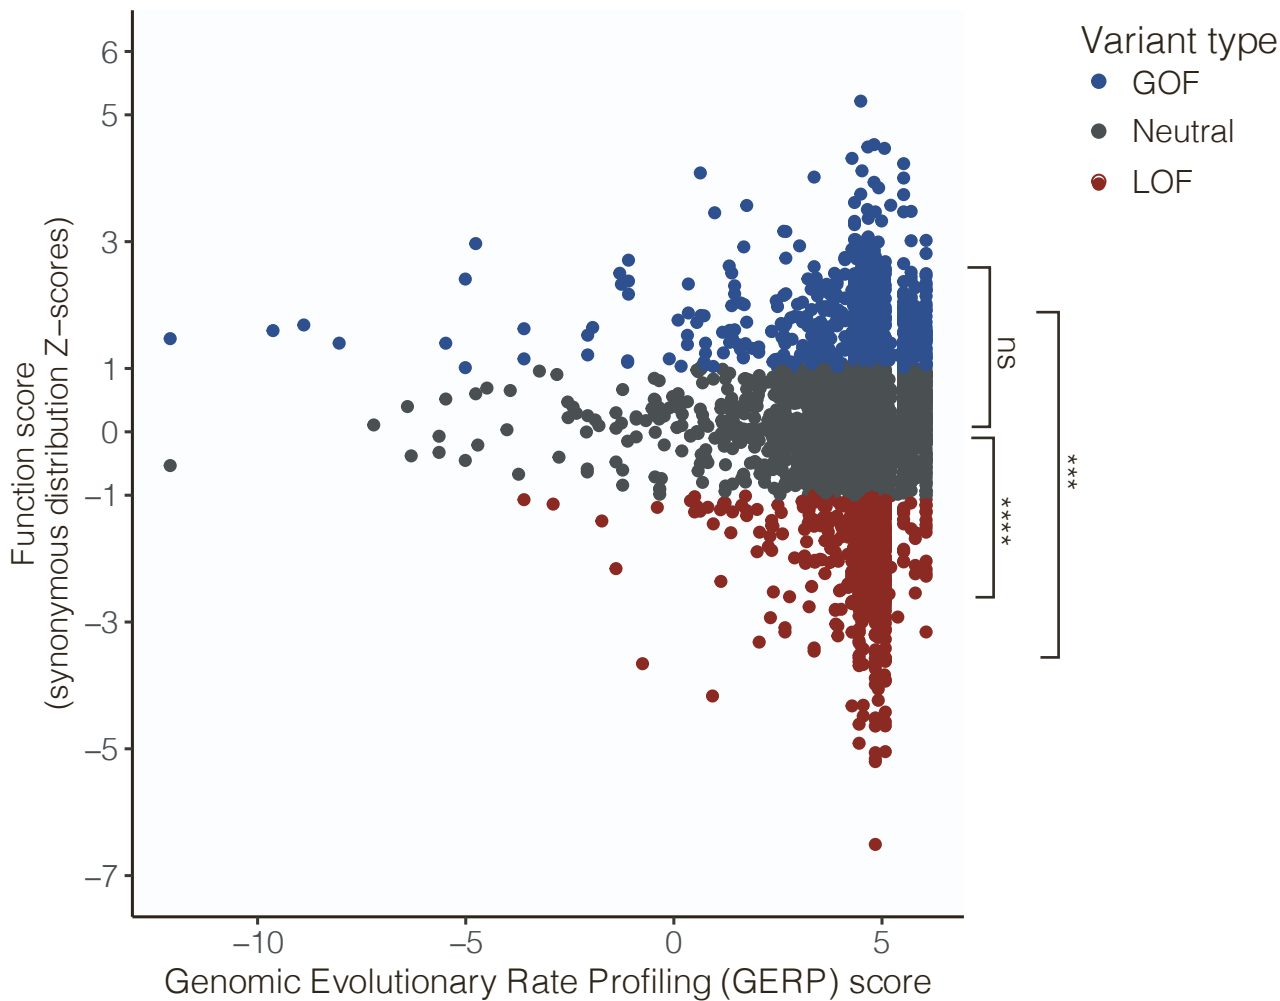

**Supplementary Figure 3. HNF1A LOF variants are more evolutionarily constrained compared to GOF and neutral variants, Related to Figure 1,2.**

Genomic Evolutionary Rate Profiling (GERP) scores for HNF1A variants versus the deep mutational scan function scores. Unlike GOF and neutral variants, LOF variants were depleted of low GERP scores, indicating these variants have fewer substitutions than what is expected based on the neutral rate of evolution across the phylogeny and are thus more evolutionarily constrained. (\*\*\*\*  $p < 10^{-6}$ , \*\*\*  $p < 2 \times 10^{-3}$ , Wilcoxon rank sum test)

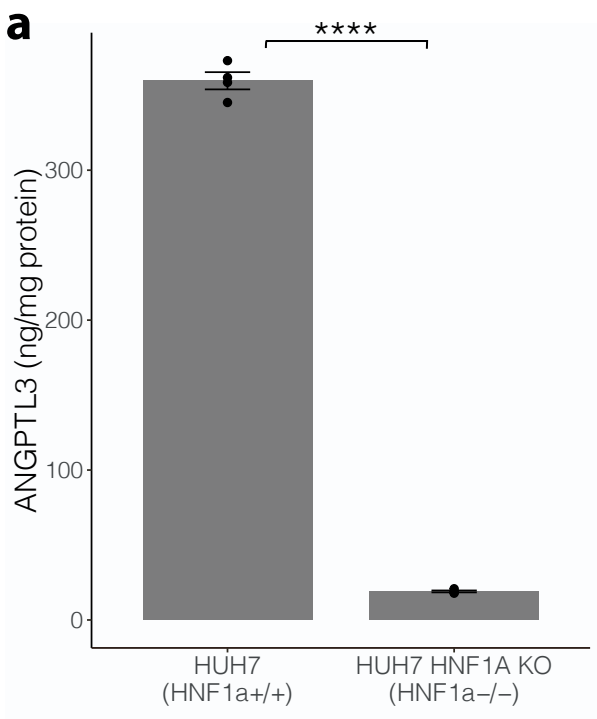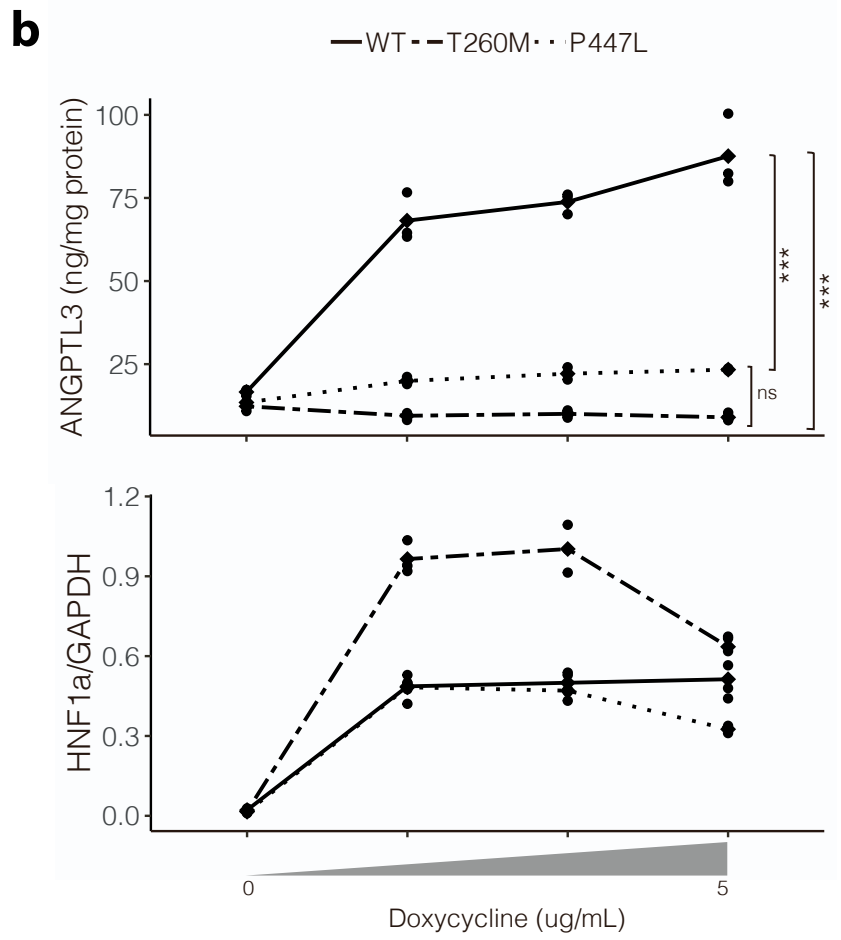

**Supplementary Figure 4. HNF1A regulates the hepatic secretion of ANGPTL3, Related to Figure 2**  
**a)** Media from cultured WT and HNF1A deficient HUH7 hepatocytes was assessed for ANGPTL3 protein by ELISA 48 hours post confluency (n=3 per group, \*\*\*\*  $p < 8.5 \times 10^{-6}$ , Student's T-test). **b)** (top) Doxycycline-inducible WT and known LOF HNF1A mutant constructs were transduced into HNF1A deleted HUH7 hepatocytes and treated with doxycycline at the following concentrations: 0, 0.5, 1 and 5  $\mu\text{g}/\text{mL}$  (n=3 per group). ANGPTL3 secretion was measured in the media by ELISA normalized to total extracted protein. Both WT and mutant HNF1A transgenes express in a doxycycline dose dependent fashion, but the mutants fail to rescue ANGPTL3 secretion as WT (\*\*\*) adjusted  $p < 1.0 \times 10^{-7}$ , Tukey pairwise multiple comparisons test). (bottom) The HNF1A band intensity was measured and plotted for each sample as a fraction of band intensity of endogenous GAPDH loading control.

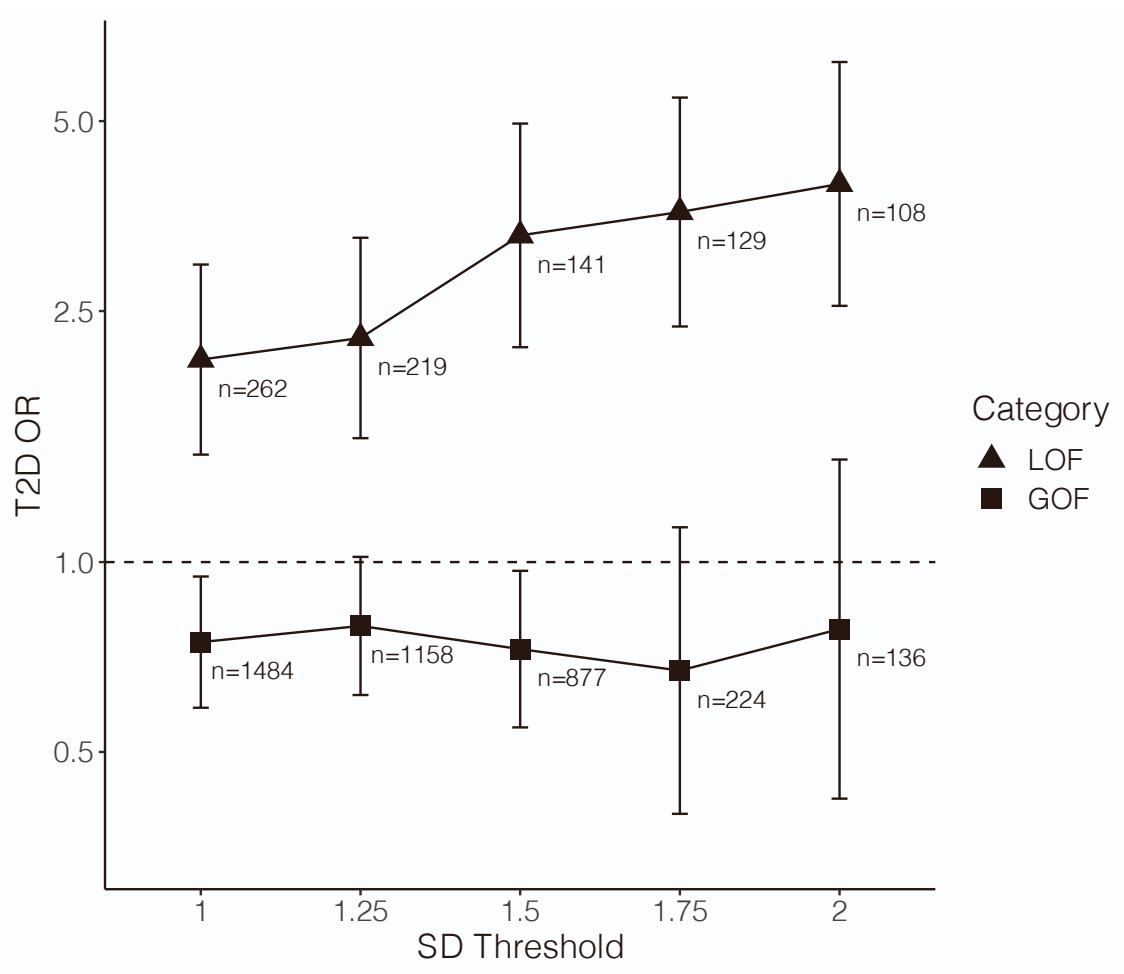

**Supplementary Figure 5: Sensitivity analysis of LOF/GOF thresholding on association with T2D, Related to Figure 3.**

Association of LOF and GOF HNF1A variants with T2D in the UK Biobank at varying thresholds of variant categorization. Each value along the x-axis represents the standard deviation (SD) of the function score distribution of synonymous variants used to classify variants as LOF or GOF. Odds ratios and the 95% confidence interval for association with T2D are shown on the y-axis. The number of human carriers for LOF and GOF variants at each categorization threshold is indicated. All corresponding numerical values can be found in Supplementary Table 6.



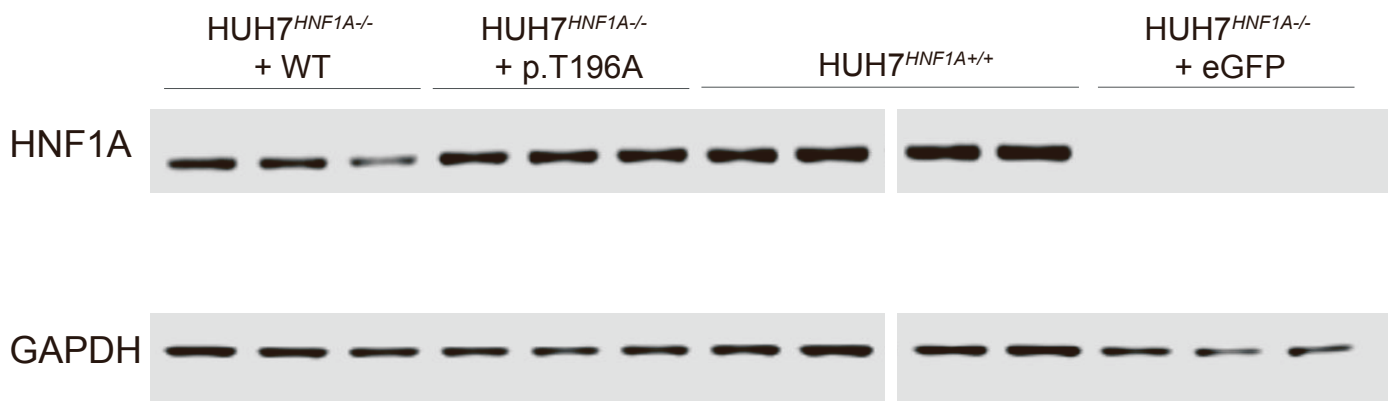

**Supplementary Figure 7. Western blot analysis for HNF1A variant protein expression levels, Related to Figure 4**

(top) HNF1A immunoblot for HNF1A null HUH7 cells electroporated with WT, p.T196A, or eGFP mRNA as well as WT HUH7 cells. (bottom) The same samples were immunoblotted for GAPDH. The HNF1A null HUH7 cells electroporated with WT and p.T196A have HNF1A expression on par with WT HUH7 cells.



## Alnylam Human Genetics

Aimee M. Deaton<sup>1</sup>, Rachel A. Hoffing<sup>1</sup>, Aaron M. Holleman<sup>1</sup>, Lynne Krohn<sup>1</sup>, Philip LoGerfo<sup>1</sup>, Paul Nioi<sup>1</sup>, Mollie E. Plekan<sup>1</sup>, Lucas D. Ward<sup>1</sup>

### Affiliations

<sup>1</sup>Alnylam Pharmaceuticals, Cambridge, MA, USA

## AMP-T2D

### List of consortium members

Gonçalo R. Abecasis<sup>1,2</sup>, Carlos A. Aguilar-Salinas<sup>3,4</sup>, David M. Altshuler<sup>5,6,7,8</sup>, Gil Atzmon<sup>9,10,11</sup>, Francisco Barajas-Olmos<sup>12</sup>, Aris Baras<sup>13</sup>, Nir Barzilai<sup>10</sup>, Graeme I. Bell<sup>14</sup>, Thomas W. Blackwell<sup>1</sup>, John Blangero<sup>15</sup>, Michael Boehnke<sup>16</sup>, Eric Boerwinkle<sup>17,18</sup>, Lori L. Bonnycastle<sup>19</sup>, Erwin P. Bottinger<sup>20,21</sup>, Donald W. Bowden<sup>22,23</sup>, Jennifer A. Brody<sup>24</sup>, Brian Burke<sup>25</sup>, Noël P. Burt<sup>8</sup>, David J. Carey<sup>26,27</sup>, Lizz Caulkins<sup>8</sup>, Federico Centeno-Cruz<sup>12,28</sup>, John C. Chambers<sup>29,30,31,32</sup>, Juliana Chan<sup>33</sup>, Edmund Chan<sup>34</sup>, Ling Chen<sup>35</sup>, Siying Chen<sup>16</sup>, Ching-Yu Cheng<sup>36,37,38,39</sup>, Francis S. Collins<sup>19</sup>, Cecilia Contreras-Cubas<sup>12</sup>, Adolfo Correa<sup>40</sup>, Maria Cortes<sup>41</sup>, Nancy J. Cox<sup>14,42</sup>, Emilio Córdova<sup>12</sup>, Dana Dabelea<sup>43,44</sup>, Paul S. de Vries<sup>17</sup>, Ralph A. DeFronzo<sup>45</sup>, Frederick E. Dewey<sup>13</sup>, Lawrence Dolan<sup>46</sup>, Kimberly L. Drews<sup>25</sup>, Ravindranath Duggirala<sup>15</sup>, Josée Dupuis<sup>47</sup>, Maria Elena Gonzalez<sup>48</sup>, Amanda Elliott<sup>8,35</sup>, Maria Eugenia Garay-Sevilla<sup>49</sup>, Jason Flannick<sup>8,50,51</sup>, Jose C. Florez<sup>5,8,52</sup>, James S. Floyd<sup>53</sup>, Philippe Frossard<sup>54</sup>, Christian Fuchsberger<sup>1,55</sup>, Stacey B. Gabriel<sup>41,56</sup>, Humberto García-Ortiz<sup>12</sup>, Christian Gieger<sup>57,58,59</sup>, Benjamin Glaser<sup>60</sup>, Clicerio Gonzalez<sup>61</sup>, Niels Grarup<sup>62</sup>, Leif Groop<sup>63,64</sup>, Myron Gross<sup>65</sup>, Christopher A. Haiman<sup>66</sup>, Sohee Han<sup>67</sup>, Craig L. Hanis<sup>17</sup>, Torben Hansen<sup>62,68</sup>, Nancy L. Heard-Costa<sup>69,70,71</sup>, Susan R. Heckbert<sup>72</sup>, Brian E. Henderson<sup>66</sup>, Soo Heon Kwak<sup>73</sup>, Anne U. Jackson<sup>74</sup>, Young Jin Kim<sup>67</sup>, Marit E. Jørgensen<sup>75,76,77,78</sup>, Megan Kelsey<sup>25,43</sup>, Bong-Jo Kim<sup>67</sup>, Ryan Koesterer<sup>8</sup>, Heikki A. Koistinen<sup>79,80,81</sup>, Jaspal S. Kooner<sup>31,32,82,83</sup>, Johanna Kuusisto<sup>84,85,86</sup>, Markku Laakso<sup>84,85,86,87</sup>, Leslie A. Lange<sup>88,89,90</sup>, Joseph B. Leader<sup>26,27</sup>, Juyoung Lee<sup>67</sup>, Jong-Young Lee<sup>91,92</sup>, Donna M. Lehman<sup>45</sup>, H. Lester Kirchner<sup>26,27</sup>, Allan Linneberg<sup>93,94,95,96</sup>, Jianjun Liu<sup>34,97,98</sup>, Ching-Ti Liu<sup>47</sup>, Ruth J. F. Loos<sup>20,99</sup>, Valeriya Lyssenko<sup>63,100</sup>, Ronald C. W. Ma<sup>33</sup>, Anubha Mahajan<sup>101</sup>, Alisa K. Manning<sup>8,52,102,103</sup>, Juan Manuel Malacara-Hernandez<sup>49</sup>, Anthony Marcketta<sup>13</sup>, Angélica Martínez-Hernández<sup>12</sup>, Karen Matsuo<sup>16</sup>, Elizabeth Mayer-Davis<sup>104</sup>, James B. Meigs<sup>41,52,103,105</sup>, Thomas Meitinger<sup>106,107,108,109</sup>, Elvia Mendoza-Caamal<sup>12,28</sup>, Josep M. Mercader<sup>8,110,111</sup>, Hyun Min Kang<sup>1</sup>, Karen L. Mohlke<sup>88,112</sup>, Andrew P. Morris<sup>113,114,115</sup>, Andrew D. Morris<sup>116</sup>, Alanna C. Morrison<sup>17</sup>, Anne Ndungu<sup>115</sup>, Maggie C. Y. Ng<sup>117</sup>, Peter Nilsson<sup>118</sup>, Christopher J. O'Donnell<sup>52,120,123</sup>, Colm O'Dushlaine<sup>13</sup>, Lorena Orozco<sup>12,28</sup>, Colin N. A. Palmer<sup>124</sup>, James S. Pankow<sup>125</sup>, Anthony J. Payne<sup>115</sup>, Oluf Pedersen<sup>62,126</sup>, Catherine Pihoker<sup>127</sup>, Wendy S. Post<sup>128</sup>, Michael Preuss<sup>20</sup>, Bruce M. Psaty<sup>24,129,130,131</sup>, Asif Rasheed<sup>54</sup>, Alexander P. Reiner<sup>132,133</sup>, Cristina Revilla-Monsalve<sup>134</sup>, Stephen S. Rich<sup>135</sup>, Neil R. Robertson<sup>101</sup>, Jerome I. Rotter<sup>\*136</sup>, Danish Saleheen<sup>54,137</sup>, Nicola Santoro<sup>138,139</sup>, Claudia Schurmann<sup>20,140</sup>, Laura J. Scott<sup>1</sup>, Mark Seielstad<sup>141,142,143</sup>, Yoon Shin Cho<sup>144</sup>, E. Shyong Tai<sup>34,38,145</sup>, Xueling Sim<sup>1,98</sup>, Robert Sladek<sup>146,147,148</sup>, Kerrin S. Small<sup>149</sup>, Xavier Soberón<sup>12</sup>, Kyong Soo Park<sup>73,150,151</sup>, Timothy D. Spector<sup>149</sup>, Konstantin Strauch<sup>58,59,152</sup>, Heather M. Stringham<sup>1</sup>, Tim M. Strom<sup>107,108,109</sup>, Claudia H. T. Tam<sup>33</sup>, Tanya M. Teslovich<sup>1,13</sup>, Farook Thameem<sup>153</sup>, Brian Tomlinson<sup>154</sup>, Jason M. Torres<sup>115,155</sup>, Russell P. Tracy<sup>156</sup>, Tiinamaija Tuomi<sup>63,64,157,158,159</sup>, Jaakko Tuomilehto<sup>160,161,162,163,164</sup>, Teresa Tusié-Luna<sup>4,165</sup>, Miriam S. Udler<sup>8,35</sup>, Rob M. van Dam<sup>34,98,166</sup>, Ramachandran S. Vasan<sup>70,167</sup>, Marijana Vujkovic<sup>137</sup>, Shuai Wang<sup>47</sup>, Ryan P. Welch<sup>16</sup>, Jennifer Wessel<sup>168,169,170</sup>, N. William Rayner<sup>101,171</sup>, James G. Wilson<sup>172</sup>, Daniel R. Witte<sup>78,173,174</sup>, Tien-Yin Wong<sup>39,145,175</sup>, Wing Yee So<sup>154</sup>, Mi Yeong Hwang<sup>67</sup>, Yik Ying Teo<sup>98</sup>, Philip Zeitler<sup>25,43</sup>

## Affiliations

1. Department of Biostatistics, Center for Statistical Genetics, University of Michigan, Ann Arbor, MI, USA
2. Regeneron Pharmaceuticals, Tarrytown, NY, USA
3. Instituto Nacional de Ciencias Médicas y Nutrición Salvador Zubirán, Mexico City, Mexico
4. Instituto Nacional de Ciencias Médicas y Nutrición, Mexico City, Mexico
5. Center for Genomic Medicine, Massachusetts General Hospital, Boston, MA, USA
6. Department of Biology, Massachusetts Institute of Technology, Cambridge, MA, USA
7. Department of Molecular Biology, Harvard Medical School, Boston, MA, USA
8. Programs in Metabolism and Medical and Population Genetics, Broad Institute of MIT and Harvard, Cambridge, MA, USA
9. Department of Medicine, Department of Genetics, Albert Einstein College of Medicine, New York, NY, USA
10. Departments of Medicine and Genetics, Albert Einstein College of Medicine, NY, USA
11. University of Haifa, Faculty of Natural Science, Haifa, Israel
12. Instituto Nacional de Medicina Genómica, Mexico City, Mexico
13. Regeneron Genetics Center, Regeneron Pharmaceuticals, Tarrytown, NY, USA
14. Department of Human Genetics, University of Chicago, Chicago, IL, USA
15. Department of Human Genetics and South Texas Diabetes and Obesity Institute, University of Texas, Rio Grande Valley, Brownsville, TX, USA
16. Department of Biostatistics and Center for Statistical Genetics, University of Michigan, Ann Arbor, MI, USA
17. Human Genetics Center, Department of Epidemiology, Human Genetics, and Environmental Sciences, School of Public Health, The University of Texas Health Science Center at Houston, Houston, Texas, USA
18. Human Genome Sequencing Center, Baylor College of Medicine, Houston, TX, USA
19. National Human Genome Research Institute, National Institutes of Health, Bethesda, MD, USA
20. Charles R. Bronfman Institute of Personalized Medicine, Mount Sinai School of Medicine, New York, NY, USA
21. The Charles Bronfman Institute for Personalized Medicine, Icahn School of Medicine at Mount Sinai, New York, NY, USA
22. Department of Biochemistry, Wake Forest School of Medicine, Winston-Salem, NC, USA
23. Wake Forest University, Winston-Salem, NC, USA
24. Cardiovascular Health Research Unit, University of Washington, Seattle, WA, USA
25. Biostatistics Center, George Washington University, Washington, DC, USA
26. Geisinger Health System, Danville, PA, USA

27. Geisinger, Danville, PA, USA
28. Instituto Nacional de Medicina Genómica, Mexico City, Mexico
29. Department of Cardiology, Ealing Hospital NHS Trust, Southall, Middlesex, UK
30. Department of Epidemiology and Biostatistics, Imperial College London, London, UK
31. Ealing Hospital National Health Service (NHS) Trust, Middlesex, UK
32. Imperial College Healthcare NHS Trust, London, UK
33. Li Ka Shing Institute of Health Sciences, Chinese University of Hong Kong, Hong Kong, China
34. Department of Medicine, Yong Loo Lin School of Medicine, National University of Singapore, Singapore
35. Diabetes Research Center (Diabetes Unit), Department of Medicine, Massachusetts General Hospital, Boston, MA, USA
36. Office of Clinical Sciences, Duke-NUS Graduate Medical School, National University of Singapore, Singapore
37. Ophthalmology and Visual Sciences Academic Clinical Program (Eye ACP), Duke-NUS Medical School, Singapore
38. Saw Swee Hock School of Public Health, National University of Singapore and National University Health System, Singapore
39. Singapore Eye Research Institute, Singapore National Eye Centre, Singapore
40. Department of Medicine, University of Mississippi Medical Center, Jackson, MS, USA
41. Broad Institute of MIT and Harvard, Cambridge, MA, USA
42. Vanderbilt Genetics Institute, Vanderbilt University, Nashville, TN, USA
43. Children's Hospital Colorado, Aurora, CO, USA
44. Department of Epidemiology, Colorado School of Public Health, Aurora, CO, USA
45. Department of Medicine, University of Texas Health San Antonio, San Antonio, TX, USA
46. Cincinnati Children's Hospital Medical Center, Cincinnati, OH, USA
47. Department of Biostatistics, Boston University School of Public Health, Boston, MA, USA
48. Centro de Estudios en Diabetes, Mexico City, Mexico
49. Departments of Medicine and Human Genetics, University of Chicago, Chicago, IL, USA
50. Department of Pediatrics, Harvard Medical School, Boston, MA, USA
51. Division of Genetics and Genomics, Boston Children's Hospital, Boston, MA, USA
52. Department of Medicine, Harvard Medical School, Boston, MA, USA
53. Department of Medicine and Epidemiology, University of Washington, Seattle, WA, USA
54. Center for Non-Communicable Diseases, Karachi, Pakistan
55. Institute for Biomedicine, Eurac Research, Bolzano, Italy
56. Genomics Platform, Broad Institute of Harvard and MIT, Cambridge, MA, USA

57. German Center for Diabetes Research (DZD e.V.), Neuherberg, Germany
58. Institute of Genetic Epidemiology, Helmholtz Zentrum München, Neuherberg, Germany
59. Research Unit of Molecular Epidemiology, Institute of Epidemiology, Helmholtz Zentrum München, German Research Center for Environmental Health, Neuherberg, Germany
60. Department of Endocrinology and Metabolism, Hadassah Medical Center and Faculty of Medicine, Hebrew University of Jerusalem, Israel
61. Unidad de Diabetes y Riesgo Cardiovascular, Instituto Nacional de Salud Pública, Cuernavaca, Morelos, Mexico
62. The Novo Nordisk Foundation Center for Basic Metabolic Research, Faculty of Health and Medical Sciences, University of Copenhagen, Copenhagen, Denmark
63. Department of Clinical Sciences, Diabetes and Endocrinology, Lund University Diabetes Centre, Malmö, Sweden
64. Institute for Molecular Genetics Finland, University of Helsinki, Helsinki, Finland
65. Department of Laboratory Medicine and Pathology, University of Minnesota, Minneapolis, MN, USA
66. Department of Preventive Medicine, Keck School of Medicine, University of Southern California, Los Angeles, CA, USA
67. Division of Genome Science, Department of Precision Medicine, National Institute of Health, Chungcheongbuk- do, Republic of Korea
68. Faculty of Health Sciences, University of Southern Denmark, Odense, Denmark
69. Boston University, Boston, MA, USA
70. National Heart, Lung, and Blood Institute Framingham Heart Study, Framingham, MA, USA
71. Department of Neurology, Boston University School of Medicine, Boston, MA, USA
72. Cardiovascular Health Research Unit and Department of Epidemiology, University of Washington, Seattle, WA, USA
73. Department of Internal Medicine, Seoul National University Hospital, Seoul, Republic of Korea
74. Department of Pathology, University of Michigan, Ann Arbor, MI, USA
75. Greenland Centre for Health Research, University of Greenland, Nuuk, Greenland
76. National Institute of Public Health, University of Southern Denmark, Odense, Denmark
77. Steno Diabetes Center Copenhagen, Gentofte, Denmark
78. Steno Diabetes Center, Gentofte, Denmark
79. Department of Public Health Solutions, National Institute for Health and Welfare, Helsinki, Finland
80. Minerva Foundation Institute for Medical Research, Helsinki, Finland
81. University of Helsinki and Department of Medicine, Helsinki University Central Hospital, Helsinki, Finland
82. National Heart and Lung Institute (NHLI), Imperial College London, Hammersmith Hospital, London, UK
83. National Heart and Lung Institute, Cardiovascular Sciences, Hammersmith Campus, Imperial College London, London, UK

84. Department of Medicin, Kuopio University Hospital, Kuopio, Finland
85. Institute of Clinical Medicine, Internal Medicine, University of Eastern Finland and Kuopio University Hospital, Kuopio, Finland
86. Institute of Clinical Medicine, Internal Medicine, University of Eastern Finland, Kuopio, Finland
87. Department of Medicine, University of Eastern Finland, Kuopio Campus and Kuopio University Hospital, Kuopio, Finland
88. Department of Genetics, University of North Carolina, Chapel Hill, NC, USA
89. Department of Medicine, University of Colorado Denver, Anschutz Medical Campus, Aurora, CO, USA
90. University of North Carolina Chapel Hill, Chapel Hill, NC, USA
91. Center for Genome Science, Korea National Institute of Health, Osong Health Technology Administration Complex, Chungcheongbuk-do, South Korea
92. Department of Business Data Convergence, Chungbuk National University, Gyeonggi-do, Republic of Korea
93. Center for Clinical Research and Prevention, Bispebjerg and Frederiksberg Hospital, Copenhagen, Denmark
94. Department of Clinical Experimental Research, Rigshospitalet, Copenhagen, Denmark
95. Department of Clinical Medicine, Faculty of Health and Medical Sciences, University of Copenhagen, Copenhagen, Denmark
96. Research Centre for Prevention and Health, Glostrup University Hospital, Glostrup, Denmark
97. Genome Institute of Singapore, Agency for Science Technology and Research, Singapore
98. Saw Swee Hock School of Public Health, National University of Singapore and National University Health System, Singapore
99. The Mindich Child Health and Development Institute, Icahn School of Medicine at Mount Sinai, New York, NY, USA
100. University of Bergen, Bergen, Norway
101. Wellcome Trust Centre for Human Genetics, University of Oxford, Oxford, UK
102. Clinical and Translational Epidemiology Unit, Massachusetts General Hospital, Harvard University, Cambridge, MA, USA
103. Massachusetts General Hospital, Boston, MA, USA
104. University of North Carolina, Chapel Hill, NC, USA
105. General Medicine Division, Massachusetts General Hospital, Boston, MA, USA
106. Deutsches Forschungszentrum für Herz-Kreislaufferkrankungen (DZHK), Partner Site Munich Heart Alliance, Munich, Germany
107. Human Genetics, Helmholtz Zentrum München, Neuherberg, Germany
108. Institute of Human Genetics, Helmholtz Zentrum München, German Research Center for Environmental Health, Neuherberg, Germany
109. Institute of Human Genetics, Technische Universität München, Munich, Germany

110. Center for Human Genetic Research and Diabetes Research Center (Diabetes Unit), Massachusetts General Hospital, Boston, MA, USA
111. Joint BSC-CRG-IRB Research Program in Computational Biology, Barcelona Supercomputing Center, Barcelona, Spain
112. Department of Genetics, University of North Carolina Chapel Hill, Chapel Hill, NC, USA
113. Department of Biostatistics, University of Liverpool, Liverpool, UK
114. Department of Genetic Medicine, Manchester Academic Health Sciences Centre, Manchester, UK
115. Wellcome Centre for Human Genetics, Nuffield Department of Medicine, University of Oxford, Oxford, UK
116. Clinical Research Centre, Centre for Molecular Medicine, Ninewells Hospital and Medical School, Dundee, UK
117. Center for Genomics and Personalized Medicine Research, Center for Diabetes Research, Department of Biochemistry, Department of Internal Medicine, Wake Forest School of Medicine, Winston- Salem, NC, USA
118. Department of Clinical Sciences, Medicine, Lund University, Malmö, Sweden
119. Cardiology Division, Massachusetts General Hospital, Boston, MA, USA
120. Brigham and Women's Hospital, Boston, MA, USA
121. Intramural Administration Management Branch, National Heart Lung and Blood Institute, NIH, Framingham, MA, USA
122. National Heart, Lung, and Blood Institute, Bethesda, MD, USA
123. Section of Cardiology, Department of Medicine, VA Boston Healthcare, Boston, MA, USA
124. Pat Macpherson Centre for Pharmacogenetics and Pharmacogenomics, Medical Research Institute, Ninewells Hospital and Medical School, Dundee, UK
125. Division of Epidemiology and Community Health, School of Public Health, University of Minnesota, Minneapolis, MN, USA
126. Center for Clinical Metabolic Research, Herlev-Gentofte University Hospital, Copenhagen, Denmark
127. Seattle Children's Hospital, Seattle, WA, USA
128. Division of Cardiology, Department of Medicine, Johns Hopkins University, Baltimore, MD, USA
129. Group Health Research Institute, Group Health Cooperative, Seattle, WA, USA
130. Group Health Research Institute, Seattle, WA, USA
131. Kaiser Permanente Washington Health Research Institute, Seattle, WA, USA
132. Fred Hutchinson Cancer Research Center, Seattle, WA, USA
133. University of Washington, Seattle, WA, USA
134. Instituto Mexicano del Seguro Social SXXI, Mexico City, Mexico
135. Center for Public Health Genomics, University of Virginia School of Medicine, Charlottesville, VA, USA

136. The Institute for Translational Genomics and Population Sciences, Department of Pediatrics, The Lundquist Institute for Biomedical Innovation at Harbor-UCLA Medical Center, Torrance, CA 90502 USA
137. Department of Biostatistics and Epidemiology, University of Pennsylvania, Philadelphia, PA, USA
138. Department of Pediatrics, Yale University, New Haven, CT, USA
139. Yale School of Medicine, New Haven, CT, USA
140. The Genetics of Obesity and Related Metabolic Traits Program, Icahn School of Medicine at Mount Sinai, New York, NY, USA
141. Blood Systems Research Institute, San Francisco, CA, USA
142. Department of Laboratory Medicine and Institute for Human Genetics, University of California, San Francisco, San Francisco, CA, USA
143. University of California San Francisco, San Francisco, CA, USA
144. Department of Biomedical Science, Hallym University, Gangwon-do, South Korea
145. Duke-NUS Medical School, Singapore
146. Department of Medicine, Royal Victoria Hospital, Montréal, Québec, Canada
147. Division of Endocrinology and Metabolism, Department of Medicine, McGill University, Montréal, Québec, Canada
148. McGill University and Génome Québec Innovation Centre, Montreal, Quebec, Canada
149. Department of Twin Research and Genetic Epidemiology, King's College London, London, UK
150. Department of Internal Medicine, Seoul National University College of Medicine, Seoul, Republic of Korea
151. Department of Molecular Medicine and Biopharmaceutical Sciences, Graduate School of Convergence Science and Technology, Seoul National University, Seoul, South Korea
152. Institute of Medical Informatics, Biometry and Epidemiology, Chair of Genetic Epidemiology, Ludwig-Maximilians-Universität, Neuherberg, Germany
153. Department of Biochemistry, Faculty of Medicine, Health Science Center, Kuwait University, Safat, Kuwait
154. Department of Medicine and Therapeutics, Chinese University of Hong Kong, Hong Kong, China
155. Department of Medicine, University of Chicago, Chicago, IL, USA
156. Department of Biochemistry, Robert Larner M.D. College of Medicine, University of Vermont, Burlington, VT, USA
157. Department of Endocrinology, Abdominal Centre, Helsinki University Hospital, Helsinki, Finland
158. Folkhälsan Research Centre, Helsinki, Finland
159. Research Programs Unit, Diabetes and Obesity, University of Helsinki, Helsinki, Finland
160. Center for Vascular Prevention, Danube University Krems, Krems, Austria
161. Department of Public Health, University of Helsinki, Helsinki, Finland
162. Diabetes Prevention Unit, National Institute for Health and Welfare, Helsinki, Finland



163. Diabetes Research Group, King Abdulaziz University, Jeddah, Saudi Arabia
164. Instituto de Investigacion Sanitaria del Hospital Universitario LaPaz (IdiPAZ), University Hospital La- Paz, Autonomous University of Madrid, Madrid, Spain
165. Instituto de Investigaciones Biomédicas, Departamento de Medicina Genómica y Toxicología Ambiental, Universidad Nacional Autónoma de México, Mexico City, Mexico
166. Department of Nutrition, Harvard School of Public Health, Boston, MA, USA
167. Preventive Medicine and Epidemiology, Medicine, Boston University School of Medicine, Boston, MA, USA
168. Department of Epidemiology, Fairbanks School of Public Health, Indianapolis, IN, USA
169. Department of Medicine, Indiana University School of Medicine, Indianapolis, IN, USA
170. Department of Medicine, School of Medicine, Indiana University, Indianapolis, IN, USA
171. Department of Human Genetics, Wellcome Trust Sanger Institute, Hinxton, Cambridgeshire, UK
172. Department of Physiology and Biophysics, University of Mississippi Medical Center, Jackson, MS, USA
173. Danish Diabetes Academy, Odense, Denmark
174. Department of Public Health, Aarhus University, Aarhus, Denmark
175. Department of Ophthalmology, Yong Loo Lin School of Medicine, National University of Singapore, National University Health System, Singapore

\* supported in part by the National Institute of Diabetes and Digestive and Kidney Disease Diabetes Research Center (DRC) grant DK063491 to the Southern California Diabetes Endocrinology Research Center.
